# Supplementary material for: Position-Dependent Segmental Relaxation in Bottlebrush Polymers
Source: PubMed Central journal article supplement (PMC11140752; doi:10.1021/acs.macromol.4c00243), 2024-05-11
Supplement: ma4c00243_si_001.pdf [file ma4c00243_si_001.pdf]

# Supporting Information

## Position Dependent Segmental Relaxation in Bottlebrush Polymers

**Karin J. Bichler<sup>1\*</sup>, Bruno Jakobi<sup>1</sup>, Alice Klapproth<sup>2</sup>, Richard A. Mole<sup>2</sup>, Gerald J. Schneider<sup>1,3\*</sup>**

<sup>1</sup> Department of Chemistry, Louisiana State University, Baton Rouge, Louisiana 70803, United States

<sup>2</sup> Australian Nuclear Science and Technology Organisation, New Illawarra Road, Lucas Heights, 2234, NSW, Australia

<sup>3</sup> Department of Physics & Astronomy, Louisiana State University, Baton Rouge, Louisiana 70803, United States

Correspondence: kbichler@lsu.edu, gjschneider@lsu.edu

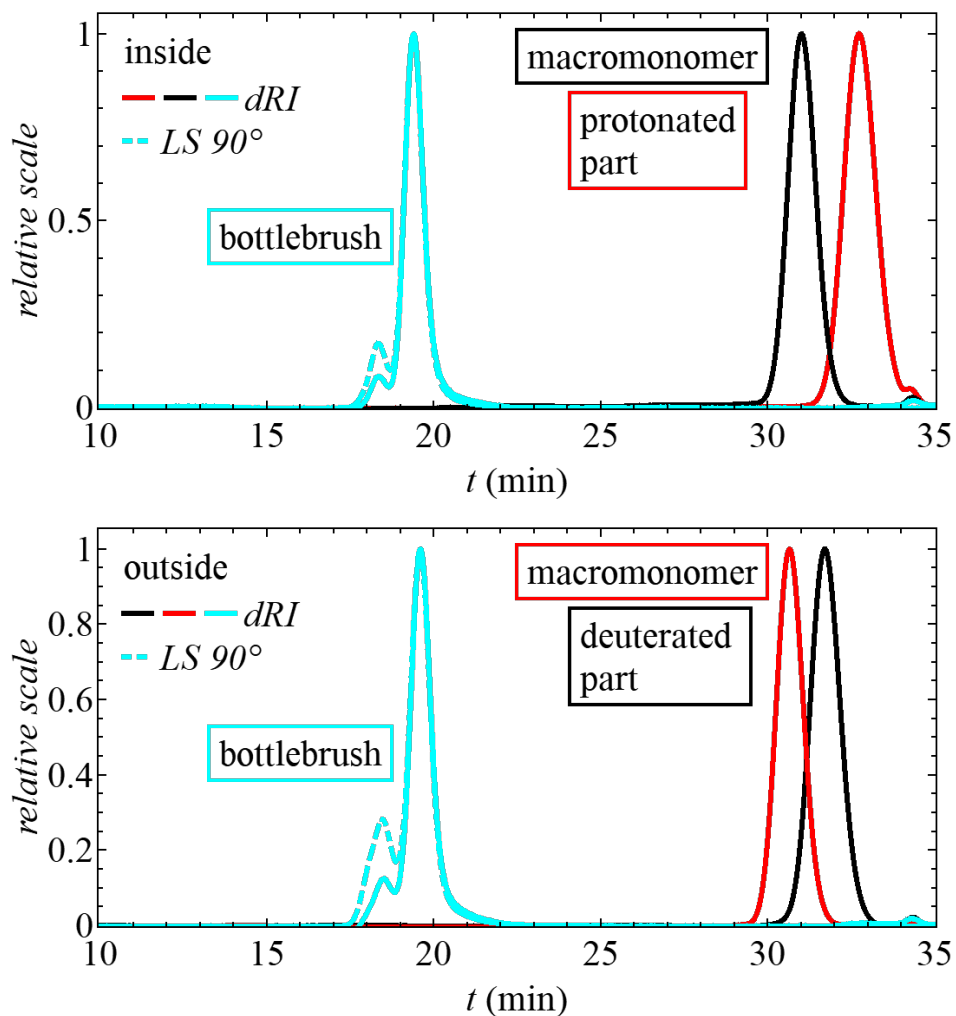

**Figure S1:** Differential refractive index (dRI) (solid line) and 90° light scattering (90° LS) (dotted line) signal of the GPC chromatogram of all inner parts, macromonomers, and bottlebrushes for the samples inside (**top**) and outside (**bottom**).

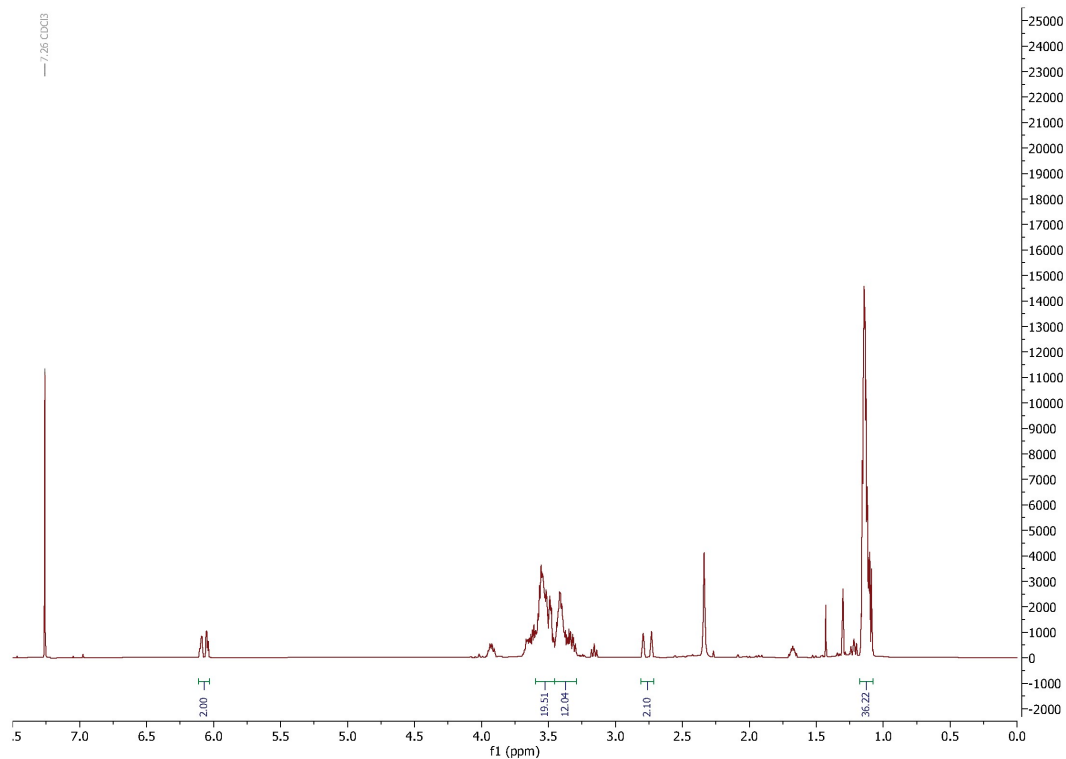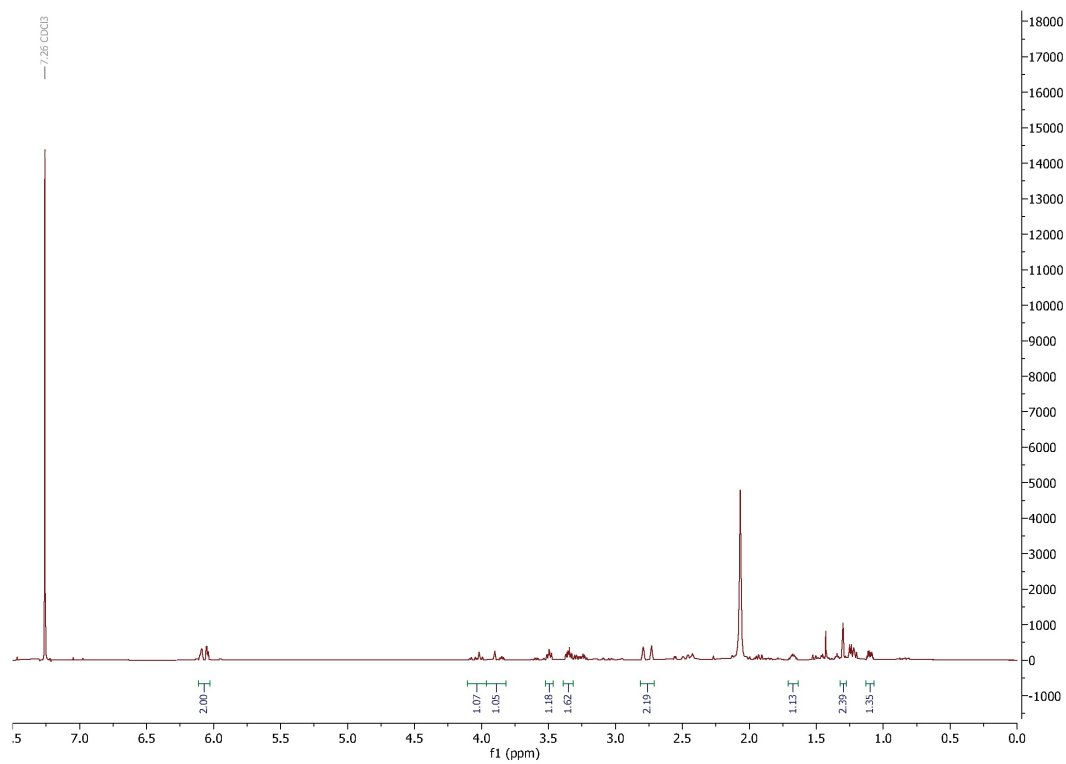

**Figure S2:**  $^1\text{H}$  NMR of the inner part of the macromonomer for the sample inside (**top**), and outside (**bottom**).

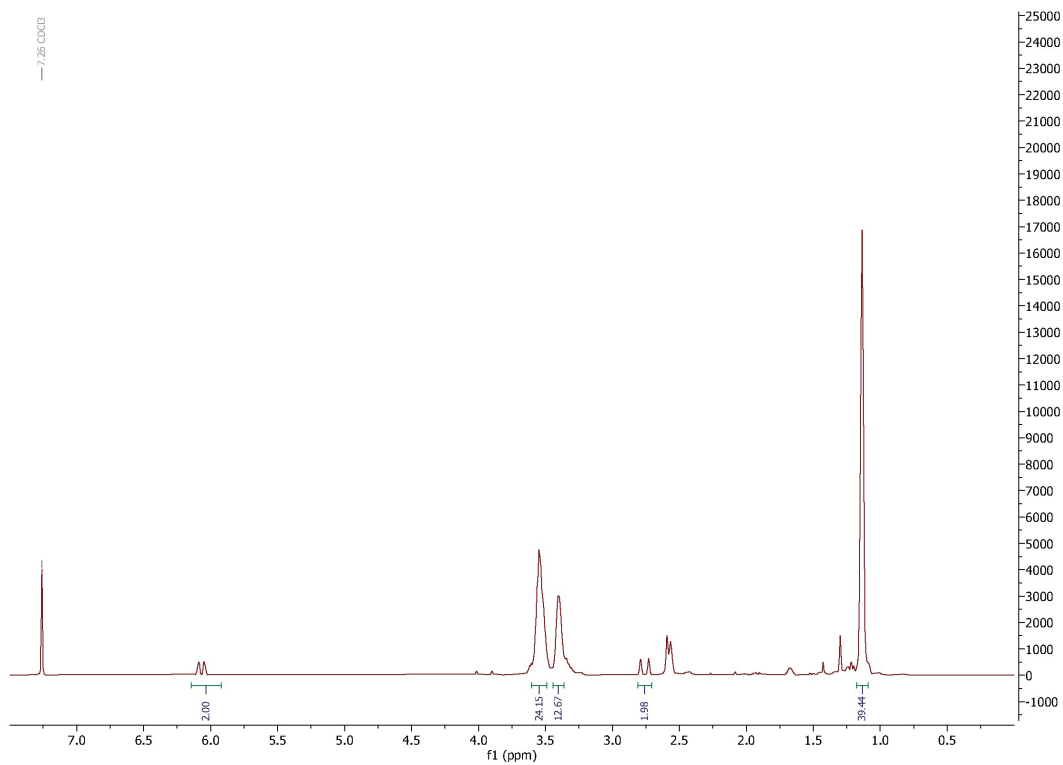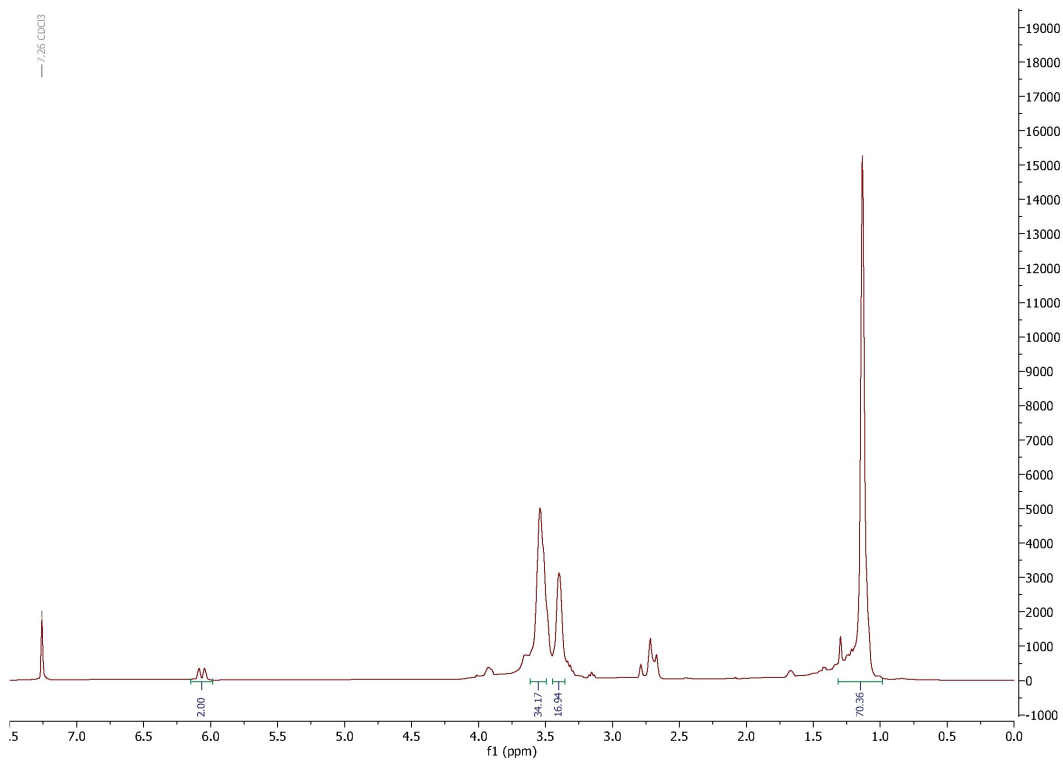

**Figure S3:** <sup>1</sup>H NMR of the complete macromonomer for the sample inside (**top**), and outside (**bottom**).

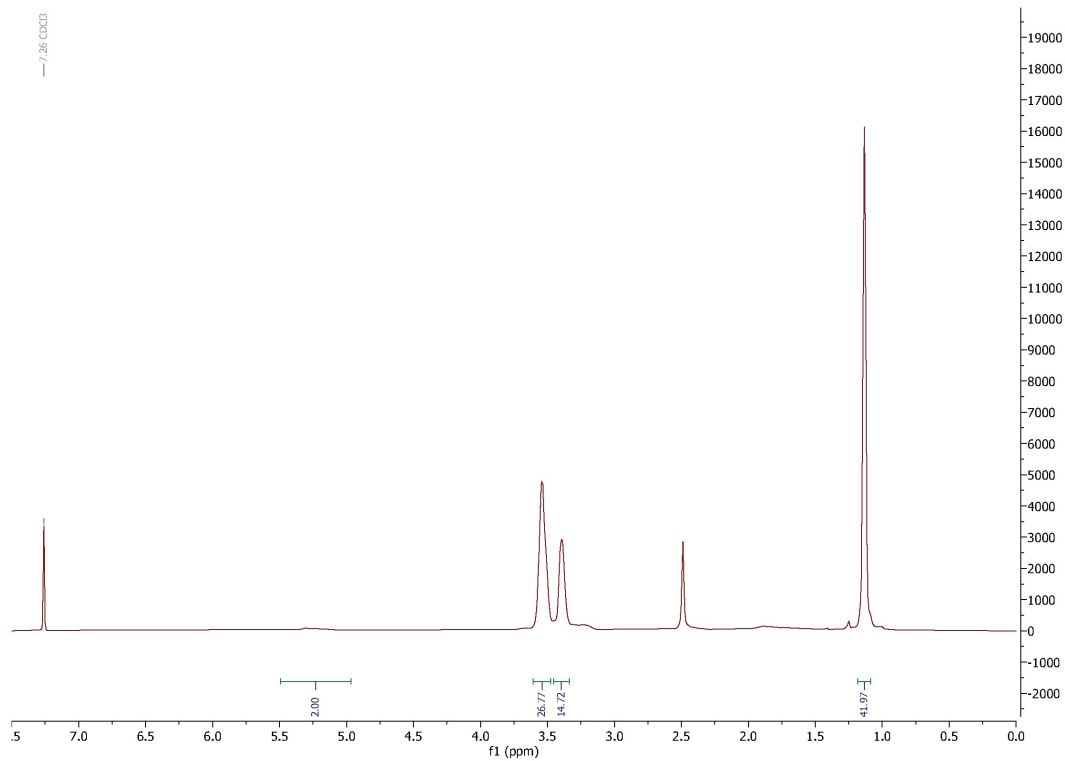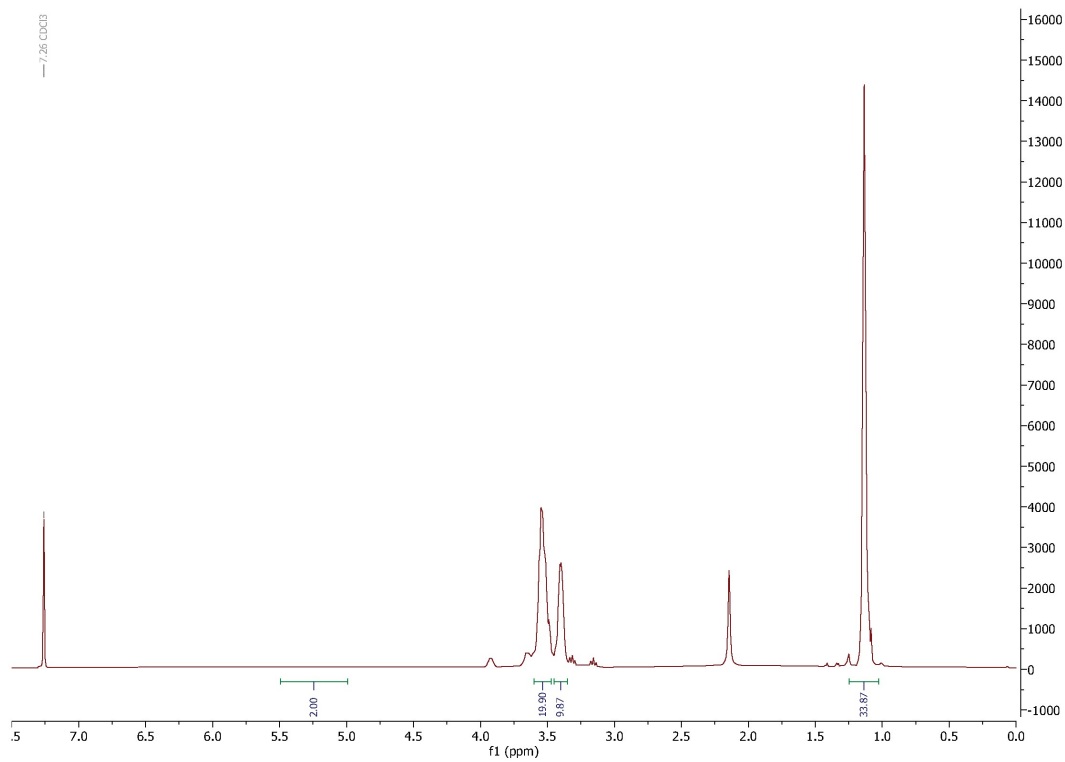

**Figure S4:**  $^1\text{H}$  NMR of finished bottlebrush for the sample inside (**top**), and outside (**bottom**).
